# Supplementary material
Source: Springer Nature journal article supplement (https://www.springermedizin.de/resource/supplementary/12974_2014_962_MOESM3_ESM.pdf/9600538)

**Ai**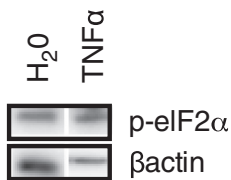**Aii**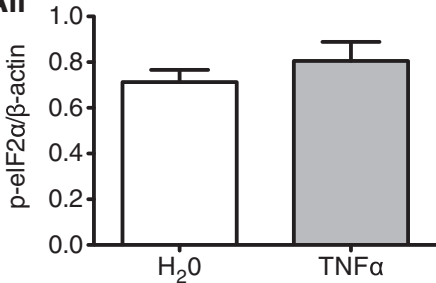**B**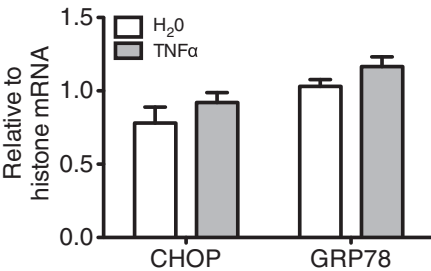**C**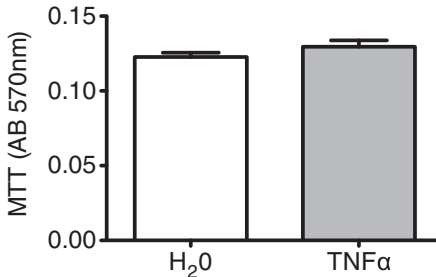

Supplement: MOESM3 [file 9600538]
